# Supplementary material for: The Antithrombotic Function of Sphingosine-1-Phosphate on Human Adipose-Stem-Cell-Recellularized Tissue Engineered Vascular Graft In Vitro
Source: PubMed Central journal article supplement (PMC6829437; doi:10.3390/ijms20205218), 2019-10-21
Supplement: ijms-20-05218-s001.pdf [file ijms-20-05218-s001.pdf]

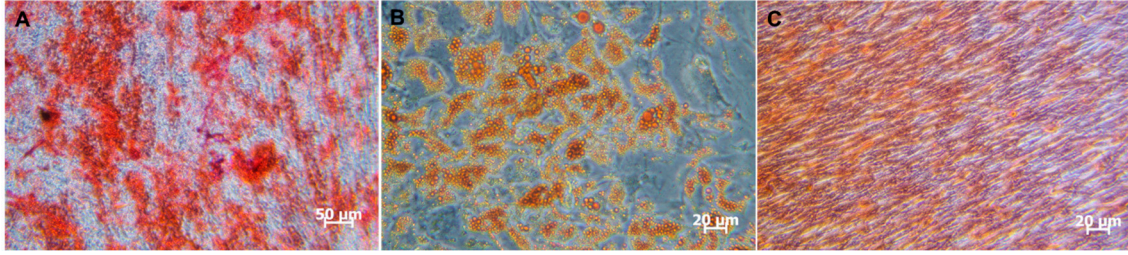

**Figure S1.** Osteogenic, Adipogenic, and chondrogenic potential of hASCs. hASCs were induced to differentiate toward the three mesodermal lineages. **A:** osteogenesis: calcium deposits visualized by Alizarin Red staining; **B:** adipogenesis: lipid content stained by Oil Red O staining; **C:** chondrogenesis: Safranin O Staining.

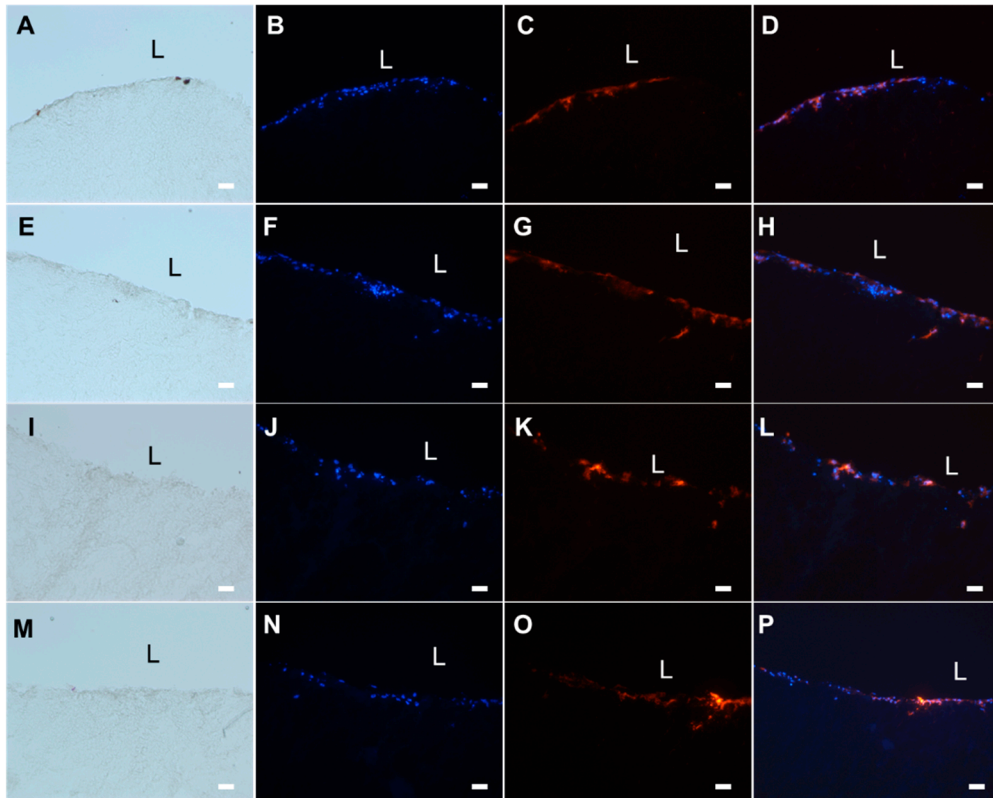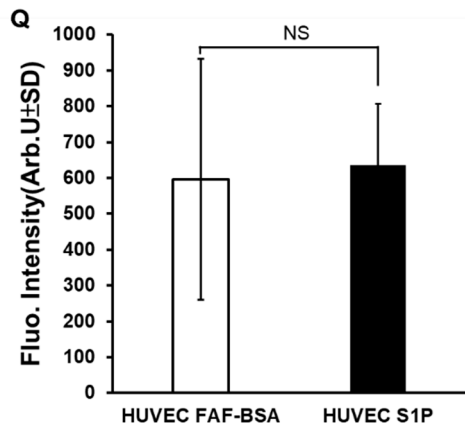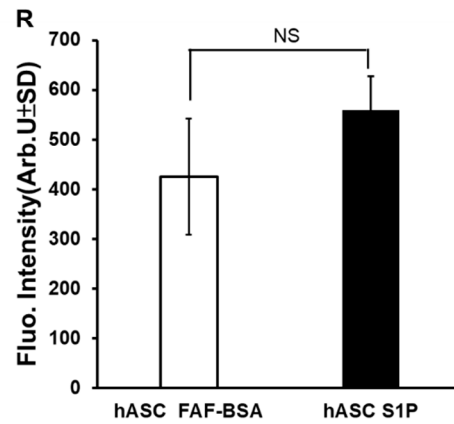

**Figure S2.** Adhesion and proliferation of hASC and HUVEC on DHUA with S1P at day 14. Cells prestained by CM-Dil seeded on DHUA under 14 days of S1P treatment. first column: bright field, second column: CM-Dil, third column: DAPI, fourth column: merge. **A,B,C,D:** images of HUVECs

seeded on DHUA without S1P; **E,F,G,H**: images of HUVECs seeded on DHUA with S1P; **I,J,K,L**: images of hASCs seeded on DHUA without S1P; **M,N,O,P**: images of hASCs seeded on DHUA with S1P; **Q**: fluorescence intensity of CM-Dil in HUVEC-seeded DHUA without and with S1P; **R**: fluorescence intensity of CM-Dil in hASC-seeded DHUA without and with S1P. It indicated that both HUVEC and hASC reached about 80% coverage to the DHUV and there was no significantly difference between the groups in present S1P and without S1P when the treatment was continuous to day 14, (all magnification 200×, scale bar = 5 μm). L: Lumen. NS: not significant.
